# Supplementary material for: Edwardsiella tarda in Tambaqui (Colossoma macropomum): A Pathogenicity, Antimicrobial Susceptibility, and Genetic Analysis of Brazilian Isolates
Source: MDPI journal article supplement (doi:10.3390/ani13182910), 2023-09-14
Supplement: s1 [file s1]

Table S1. Antimicrobial susceptibility patterns of the *E. tarda* isolates. The average inhibition zone diameters (mm) and the provisional epidemiological cutoff (CO<sub>WT</sub>) values (mm) of each isolate are presented. Isolates classified as non-wild-type for a certain antibiotic are highlighted in gray colored cells.

|                              |                              | Antimicrobial agent |           |           |          |           |           |           |
|------------------------------|------------------------------|---------------------|-----------|-----------|----------|-----------|-----------|-----------|
|                              |                              | FLO                 | NOR       | NEO       | ERY      | SXT       | AMO       | OXY       |
| <i>Colossoma macropomum</i>  | AM-ED01                      | 31                  | 26        | 11        | 12       | 23        | 27        | 28        |
|                              | AM-ED03                      | 33                  | 37        | 12        | 11       | 31        | 28        | 32        |
|                              | AM-ED05                      | 32                  | 34        | 12        | 13       | 25        | 6         | 29        |
|                              | AM-ED06                      | 33                  | 35        | 11        | 14       | 24        | 28        | 27        |
|                              | AM-ED15                      | 33                  | 36        | 11        | 13       | 26        | 27        | 27        |
|                              | AM-ED36                      | 32                  | 27        | 12        | 12       | 6         | 6         | 28        |
|                              | AM-ED38                      | 34                  | 33        | 12        | 13       | 26        | 27        | 28        |
|                              | AM-ED43                      | 32                  | 30        | 11        | 13       | 27        | 6         | 29        |
|                              | AM-ED45                      | 36                  | 36        | 12        | 13       | 32        | 26        | 34        |
|                              | AM-ED46                      | 33                  | 34        | 12        | 12       | 28        | 26        | 29        |
|                              | ED20-14                      | 33                  | 36        | 11        | 12       | 26        | 28        | 29        |
|                              | ED37-17                      | 33                  | 35        | 13        | 15       | 31        | 30        | 32        |
|                              | ED38-17                      | 32                  | 29        | 12        | 12       | 25        | 27        | 27        |
|                              | ED48-20                      | 32                  | 36        | 12        | 14       | 26        | 27        | 28        |
|                              | <b>CO<sub>WT</sub> value</b> | <b>27</b>           | <b>26</b> | <b>10</b> | <b>8</b> | <b>18</b> | <b>23</b> | <b>25</b> |
| <i>Oreochromis niloticus</i> | ED51-20                      | 35                  | 24        | 15        | 12       | 34        | 27        | 6         |
|                              | AM-ED08                      | 35                  | 38        | 11        | 12       | 24        | 29        | 28        |
| <i>Arapaima gigas</i>        | AM-ED10                      | 32                  | 32        | 11        | 11       | 27        | 27        | 28        |
|                              | AM-ED24                      | 35                  | 36        | 11        | 12       | 27        | 26        | 29        |
| <i>Brycon amazonicus</i>     | AM-ED34                      | 35                  | 36        | 12        | 11       | 27        | 27        | 31        |
| <i>Symphysodon</i> ssp.      | AM-ED04                      | 33                  | 36        | 11        | 13       | 26        | 29        | 30        |
| <i>Pterophyllum scalare</i>  | AM-ED47                      | 33                  | 34        | 11        | 11       | 30        | 28        | 30        |
| ATCC25922                    |                              | 23                  | 33        | 15        | 13       | 26        | 16        | 25        |
| ATCC33658                    |                              | 33                  | 34        | 16        | 23       | 26        | 33        | 29        |

FLO, florfenicol; NOR, norfloxacin; NEO, neomycin; ERY, erythromycin; SXT, sulfamethoxazole-trimethoprim; AMO, amoxicillin; OXY, oxytetracycline.

ATCC25922 and ATCC33658 are, respectively, *Escherichia coli* and *Aeromonas salmonicida* subsp. *salmonicida* used as control. CLSI QC ranges for NOR, NEO and AMO are not yet established.
